# Supplementary material
Source: Springer Nature journal article supplement (https://www.springermedizin.de/resource/supplementary/13229_2011_28_MOESM5_ESM.pdf/9676002)

Ln IL-4 (pg/ml)

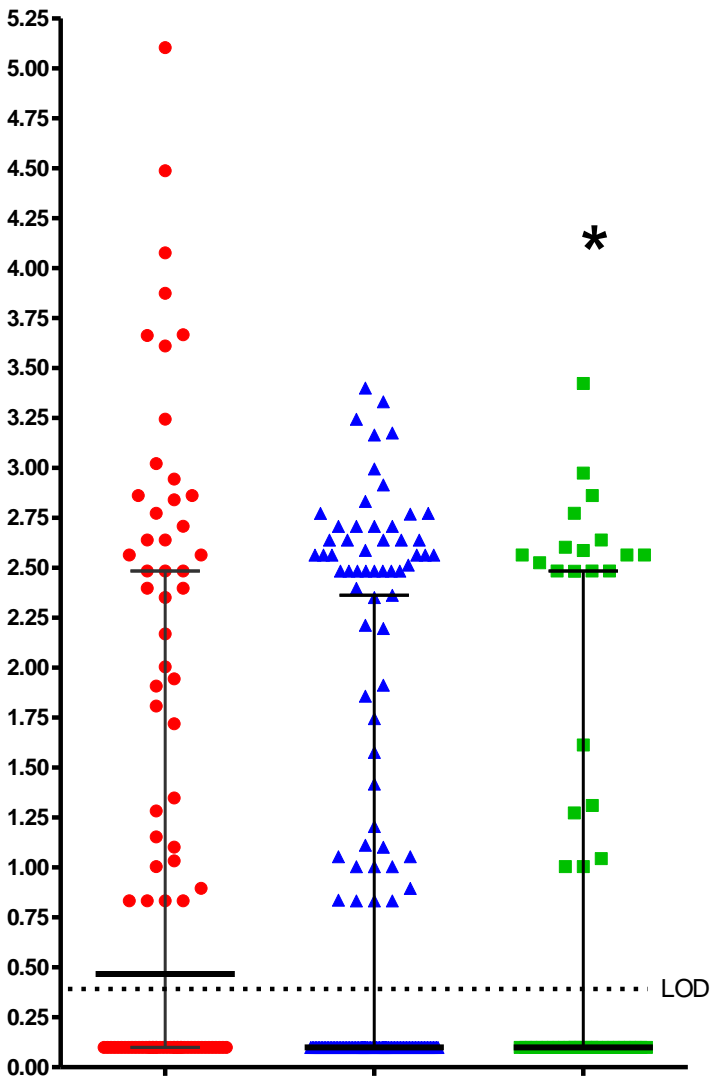

Mothers of AU

Mothers of GP

Mothers of DD

LOD

Supplement: MOESM5 [file 9676002]
